# Supplementary material
Source: PubMed Central journal article supplement (PMC2948790)
Supplement: mmc1.pdf [file mmc1.pdf]

The American Journal of Human Genetics, Volume 87

**Supplemental Data**

***BMPER* Mutation in Diaphanospondylodysostosis**

**Identified by Ancestral Autozygosity Mapping**

**and Targeted High-Throughput Sequencing**

**Vincent A. Funari, Deborah Krakow, Lisette Nevarez, Zugen Chen, Tara L. Funari,  
Nithiwat Vatanavicharn, William R. Wilcox, David L. Rimoïn, Stanley F. Nelson,  
and Daniel H. Cohn**

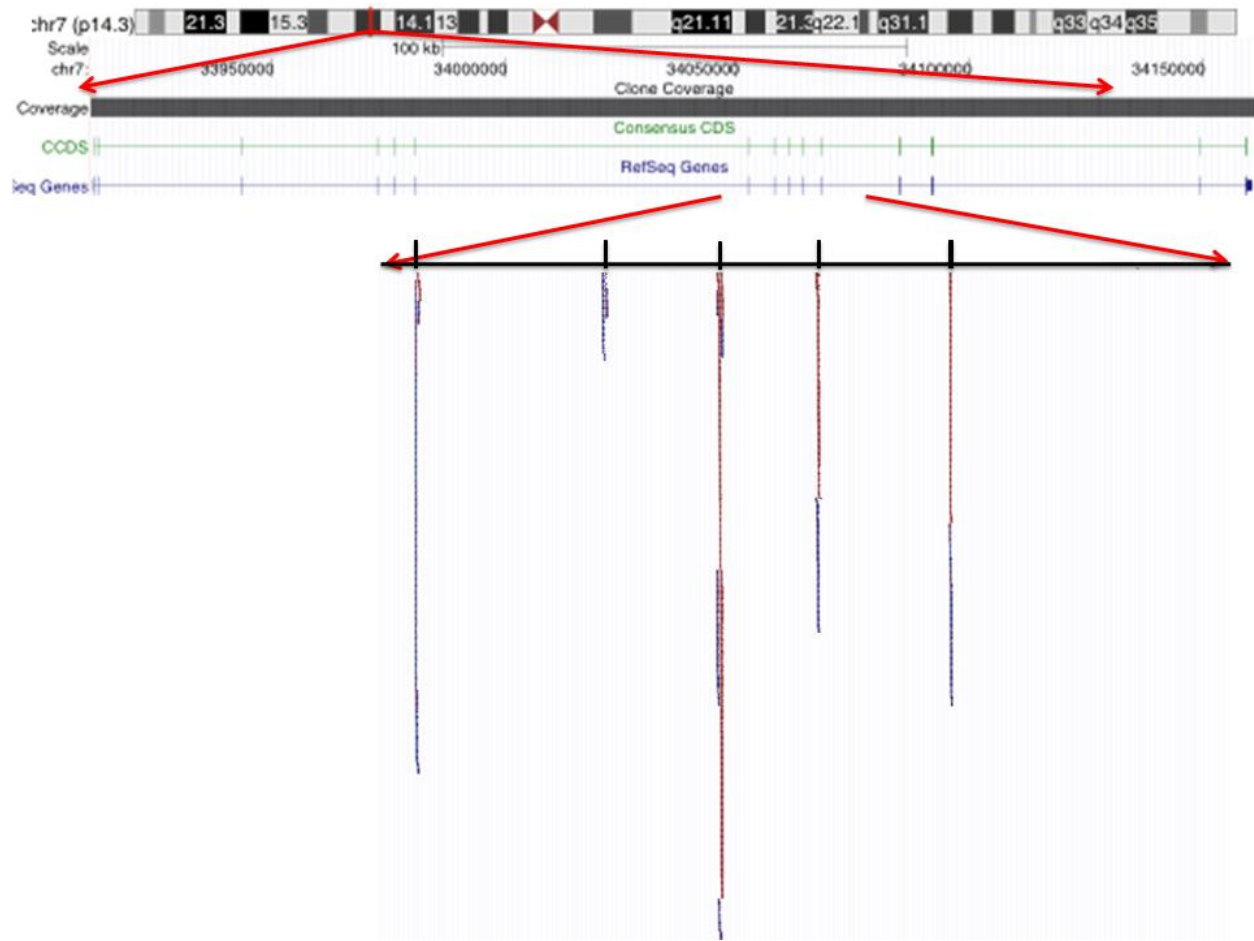

**Figure S1. Specificity of Array Based Custom Target Enrichment**

At the top, the genomic structure and location of *BMPER* on chromosome 7 is shown. Below, a zoomed view of 25 kb of *BMPER* shows the specificity of capture and sequencing for exons 7-11. Note that very few sequences were derived from genomic regions outside of the targeted exons. Forward and reverse sequences of fragments derived from the Solexa sequences are shown in red and blue, respectively, for the final 2 codons and first 3 bp of exon 9 and the succeeding intron 9. Homozygosity for the pathological sequence change c.925C>T which results in p.Q309X is shown. Confirmation of the mutation derived from sequence analysis of a PCR amplified fragment containing exon 9 from R05-062A is shown at the bottom.

**Table S1. Runs of Homozygosity (ROH) in Affected and Unaffected Siblings**

| Chr <sup>a</sup> | Affected ROH (Mb)<br>(R05-062A) | Unaffected Sib (ROH)<br>(R05-062D) | ROH<br>>3MB<br>(MB) | ROH in<br>Affected<br>Only | Total<br>Genes |
|------------------|---------------------------------|------------------------------------|---------------------|----------------------------|----------------|
| 1                |                                 | 7.414-9.250                        |                     |                            |                |
| 1                | 18.424-20.767                   |                                    |                     |                            |                |
| 1 <sup>b</sup>   | 163.458-176.256                 |                                    | 13                  | 13                         | 108            |
| 2                |                                 | 124.610-127.614                    |                     |                            |                |
| 3                |                                 | 63.366-68.863                      |                     |                            |                |
| 4                |                                 | 141.007- 154.354                   |                     |                            |                |
| 4                |                                 | 171.033-174.323                    |                     |                            |                |
| 5                |                                 | 2.705 -9.738                       |                     |                            |                |
| 5                | 31.353-32.296                   |                                    |                     |                            |                |
| 5                |                                 | 157.520-160.470                    |                     |                            |                |
| 6                | 112.409-124.223                 | 109.290-127.977                    | 12                  |                            | N/A            |
| 7 <sup>b</sup>   | 33.778-55.173                   |                                    | 21                  | 21                         | 105            |
| 9                | 107.099-108.283                 |                                    |                     |                            |                |
| 9                | 128.782-129.883                 |                                    |                     |                            |                |
| 12               |                                 | 3.332-4.825                        |                     |                            |                |
| 12               |                                 | 91.033-93.087                      |                     |                            |                |
| 17 <sup>b</sup>  | 32.306-36.011                   |                                    | 4                   | 4                          | 69             |
| 17               |                                 | 44.865-59.744                      |                     |                            |                |
| 18               |                                 | 10.585-13.236                      |                     |                            |                |
| 18               | 54.396-56.338                   | 54.471- 55.673                     |                     |                            |                |
| <b>TOTAL</b>     | <b>57.226</b>                   | <b>59.235</b>                      | <b>50</b>           | <b>38</b>                  | <b>282</b>     |

<sup>a</sup> Chromosome where run of homozygosity was detected in affected and unaffected siblings.

<sup>b</sup> Runs of Homozygosity(ROH) which were significantly long, considered autozygous in affected sibling and not also identified in the unaffected sibling.

**Table S2. Summary of All Variants Identified by Targeted High-Throughput Sequence Analysis in Diaphanospondylodysostosis Case II-2**

|                             |       |
|-----------------------------|-------|
| Number of variants detected | 1,915 |
| Known SNPs (dbSNP130)       | 1,749 |
| Unknown variants in exons   | 13    |
| Unknown stop                | 1     |

**Table S3. Primer Sequences for Amplification of the *BMPER* Exons**

| Exon | Primer Name | Sequence                  | Product Size (bp) | hg18 Chromosome Location (bp) |
|------|-------------|---------------------------|-------------------|-------------------------------|
| 1    | BMPER 1F    | gagagccctttcgactgtgag     | 438               | chr7:33911663-33911684        |
|      | BMPER 1R    | ttattactacattgaaggcaacagc |                   | chr7:33912076-33912100        |
| 2    | BMPER 2F    | aattctgaagtttggtagaggttt  | 300               | chr7:33912842-33912866        |
|      | BMPER 2R    | gataaagacaatttgaagatctgg  |                   | chr7:33913117-33913141        |
| 3    | BMPER 3F    | acctctgtggtgtgtaggatttg   | 250               | chr7:33943350-33943373        |
|      | BMPER 3R    | ggaaggtgagagaaagagaaataa  |                   | chr7:33943576-33943599        |
| 4    | BMPER 4F    | cttattttgctccaaaaggtaaagg | 249               | chr7:33972539-33972563        |
|      | BMPER 4R    | tagggttttgttctatgtgtgtga  |                   | chr7:33972763-33972787        |
| 5    | BMPER 5F    | ctcctacttaggtcactttccaaaa | 299               | chr7:33976385-33976409        |
|      | BMPER 5R    | gctctctaaaccattaggtacaca  |                   | chr7:33976659-33976683        |
| 6    | BMPER 6F    | gatgaactgtggatagaaggattgt | 264               | chr7:33980757-33980781        |
|      | BMPER 6R    | gagacgagagagaggctgtagaga  |                   | chr7:33980997-33981020        |
| 7    | BMPER 7F    | taatactatggaagggccttaggtt | 285               | chr7:34052341-34052365        |
|      | BMPER 7R    | aaaacaacaacgtggataaacactc |                   | chr7:34052601-34052625        |
| 8    | BMPER 8F    | ataatggacctatgatggaatcacc | 297               | chr7:34057911-34057935        |
|      | BMPER 8R    | caataaataacacaccattggcttt |                   | chr7:34058183-34058207        |
| 9    | BMPER 9F    | agttatgaaaggaaggccaggtag  | 297               | chr7:34061219-34061242        |
|      | BMPER 9R    | ctgcctagtgtctggagcttttta  |                   | chr7:34061492-34061515        |
| 10   | BMPER 10F   | ccatggagaggttacagtctgttg  | 281               | chr7:34064117-34064140        |
|      | BMPER 10R   | agctggagtctgtgttcggaagat  |                   | chr7:34064374-34064397        |
| 11   | BMPER 11F   | ttggactgatttcattggtttatct | 248               | chr7:34068021-34068045        |
|      | BMPER 11R   | ggaaacatacaccctatttttctt  |                   | chr7:34068244-34068268        |
| 12   | BMPER 12F   | agttgatttcccttagtgcatttct | 542               | chr7:34084874-34084898        |
|      | BMPER 12R   | accacatctcctgagtgtcttaac  |                   | chr7:34085392-34085415        |
| 13   | BMPER 13F   | tcatatgttctgtgtaaggatgat  | 500               | chr7:34091804-34091828        |
|      | BMPER 13R   | catacaccatgttccaaggtaag   |                   | chr7:34092280-34092303        |
| 14   | BMPER 14F   | cgacccttctgaagttatatttagg | 300               | chr7:34149286-34149312        |
|      | BMPER 14R   | actcatgtcagcatccacaagtct  |                   | chr7:34149562-34149586        |
| 15   | BMPER 15F   | ttaaagtcaaatgtgatcctgag   | 400               | chr7:34159094-34159118        |
|      | BMPER 15R   | cacaaatactgcagtccttcattg  |                   | chr7:34159470-34159494        |
